# Supplementary material for: Incidence and Clinical Implications of Anatomical Variations in the Pancreas and Its Ductal System: A Systematic Review and Meta-Analysis
Source: MDPI journal article supplement (doi:10.3390/life13081710), 2023-08-09
Supplement: s1 [file s1]

Supplemental Digital Content. Table S1. Searches strategies

| Database              | Search strategy                                                                                                                                                                                                                                                                                                                                                                                                                                                                                                                                                                                                                                                                                                                                  | Results  |  |
|-----------------------|--------------------------------------------------------------------------------------------------------------------------------------------------------------------------------------------------------------------------------------------------------------------------------------------------------------------------------------------------------------------------------------------------------------------------------------------------------------------------------------------------------------------------------------------------------------------------------------------------------------------------------------------------------------------------------------------------------------------------------------------------|----------|--|
|                       |                                                                                                                                                                                                                                                                                                                                                                                                                                                                                                                                                                                                                                                                                                                                                  | 07-07-23 |  |
| <b>Medline</b>        | Search: (((ductal pancreas anatomical variations)) OR (Pancreas divisum)) AND (pancreatitis) NOT (animals)<br>(((("ductal"[All Fields] AND ("pancrea"[All Fields] OR "pancreas"[MeSH Terms] OR "pancreas"[All Fields]) AND ("anatomic"[All Fields] OR "anatomical"[All Fields] OR "anatomically"[All Fields]) AND ("variation"[All Fields] OR "variations"[All Fields])) OR ("pancreas divisum"[MeSH Terms] OR ("pancreas"[All Fields] AND "divisum"[All Fields]) OR "pancreas divisum"[All Fields])) AND ("pancreas"[MeSH Terms] OR "pancreas"[All Fields] OR "pancreatic"[All Fields] OR "pancreatitides"[All Fields] OR "pancreatitis"[MeSH Terms] OR "pancreatitis"[All Fields])) NOT ("animals"[MeSH Terms:noexp] OR "animals"[All Fields]) | 985      |  |
| <b>SCOPUS</b>         | Search: (((ductal pancreas anatomical variations)) OR (Pancreas divisum)) AND (pancreatitis))                                                                                                                                                                                                                                                                                                                                                                                                                                                                                                                                                                                                                                                    | 123      |  |
| <b>Google scholar</b> | Search: (((ductal pancreas anatomical variations)) OR (Pancreas divisum)) AND (pancreatitis))                                                                                                                                                                                                                                                                                                                                                                                                                                                                                                                                                                                                                                                    | 231      |  |
| <b>CINHAL</b>         | Search: (((ductal pancreas anatomical variations)) OR (Pancreas divisum)) AND (pancreatitis))                                                                                                                                                                                                                                                                                                                                                                                                                                                                                                                                                                                                                                                    | 42       |  |

|            |                                                                                              |      |  |
|------------|----------------------------------------------------------------------------------------------|------|--|
| <b>WOS</b> | Search: (((ductal pancreas anatomical variations)) OR (Pancreas divisum)) AND (pancreatitis) | 112  |  |
|            | Total                                                                                        | 1493 |  |

\* All searches were carried out on July 07, 2023.
